# Supplementary material for: Development and evaluation of the Cancer Symptom Management System: Symptom Management Improves your LifE (SMILE)—a randomized controlled trial
Source: Springer Nature journal article supplement (doi:10.1007/s00520-019-04865-3), 2019-05-25
Supplement: MOESM1 [file 16750634]

**Supplementary 1. Severity of 20 symptoms**

|  | | | n | Mean | SD | 95% CI | | Min | Max | Kruskall-Wallis Difference  (baseline - 4th CTx cycle) among 3 groups  (N=249) | Mann-Whitney U  Difference  (baseline - 4th CTx cycle)  between 2 groups  (Exp 1 vs. Exp 2)  (n=199) |
| --- | --- | --- | --- | --- | --- | --- | --- | --- | --- | --- | --- |
| *p*-value | |
| Difficulty concentrating | baseline | Control | 50 | 0.88 | 1.89 | 0.34 | 1.42 | 0.00 | 7.00 | .915 | .682 |
| Exp 1 | 99 | 1.02 | 2.02 | 0.62 | 1.42 | 0.00 | 8.00 |
| Exp 2 | 100 | 0.89 | 1.93 | 0.51 | 1.27 | 0.00 | 7.00 |
| Total | 249 | 0.94 | 1.95 | 0.70 | 1.18 | 0.00 | 8.00 |
| 1st CTx cycle | Control | 50 | 1.22 | 2.35 | 0.55 | 1.89 | 0.00 | 8.00 | .032 | .734 |
| Exp 1 | 99 | 2.08 | 2.64 | 1.55 | 2.61 | 0.00 | 8.00 |
| Exp 2 | 100 | 2.22 | 2.83 | 1.66 | 2.78 | 0.00 | 10.00 |
| Total | 249 | 1.96 | 2.68 | 1.63 | 2.30 | 0.00 | 10.00 |
| 2nd CTx cycle | Control | 50 | 2.02 | 2.37 | 1.35 | 2.69 | 0.00 | 8.00 | .559 | .283 |
| Exp 1 | 99 | 2.04 | 2.63 | 1.52 | 2.56 | 0.00 | 10.00 |
| Exp 2 | 100 | 2.34 | 2.64 | 1.82 | 2.86 | 0.00 | 9.00 |
| Total | 249 | 2.16 | 2.58 | 1.83 | 2.48 | 0.00 | 10.00 |
| 3rd CTx cycle | Control | 50 | 2.02 | 2.37 | 1.35 | 2.69 | 0.00 | 10.00 | .765 | .545 |
| Exp 1 | 99 | 2.39 | 2.65 | 1.87 | 2.92 | 0.00 | 10.00 |
| Exp 2 | 100 | 2.11 | 2.35 | 1.64 | 2.58 | 0.00 | 8.00 |
| Total | 249 | 2.20 | 2.47 | 1.90 | 2.51 | 0.00 | 10.00 |
| 4th CTx cycle | Control | 50 | 1.98 | 2.64 | 1.23 | 2.73 | 0.00 | 10.00 | .666 | .457 |
| Exp 1 | 99 | 2.26 | 2.63 | 1.74 | 2.79 | 0.00 | 9.00 |
| Exp 2 | 100 | 1.97 | 2.48 | 1.48 | 2.46 | 0.00 | 10.00 |
| Total | 249 | 2.09 | 2.57 | 1.77 | 2.41 | 0.00 | 10.00 |
| Drowsiness | baseline | Control | 50 | 1.58 | 1.83 | 1.06 | 2.10 | 0.00 | 7.00 | .993 | .974 |
| Exp 1 | 99 | 1.70 | 2.11 | 1.28 | 2.12 | 0.00 | 8.00 |
| Exp 2 | 100 | 1.85 | 2.41 | 1.37 | 2.33 | 0.00 | 8.00 |
| Total | 249 | 1.73 | 2.18 | 1.46 | 2.01 | 0.00 | 8.00 |
| 1st CTx cycle | Control | 50 | 2.02 | 2.25 | 1.38 | 2.66 | 0.00 | 9.00 | .079 | .168 |
| Exp 1 | 99 | 2.65 | 2.83 | 2.08 | 3.21 | 0.00 | 9.00 |
| Exp 2 | 100 | 3.12 | 2.76 | 2.57 | 3.67 | 0.00 | 10.00 |
| Total | 249 | 2.71 | 2.71 | 2.37 | 3.05 | 0.00 | 10.00 |
| 2nd CTx cycle | Control | 50 | 2.18 | 1.88 | 1.65 | 2.71 | 0.00 | 8.00 | .496 | .906 |
| Exp 1 | 99 | 2.83 | 2.72 | 2.29 | 3.37 | 0.00 | 9.00 |
| Exp 2 | 100 | 2.85 | 2.66 | 2.32 | 3.38 | 0.00 | 9.00 |
| Total | 249 | 2.71 | 2.55 | 2.39 | 3.03 | 0.00 | 9.00 |
| 3rd CTx cycle | Control | 50 | 2.70 | 2.31 | 2.04 | 3.36 | 0.00 | 9.00 | .447 | .250 |
| Exp 1 | 99 | 2.87 | 2.74 | 2.32 | 3.42 | 0.00 | 9.00 |
| Exp 2 | 100 | 2.41 | 2.53 | 1.91 | 2.91 | 0.00 | 10.00 |
| Total | 249 | 2.65 | 2.57 | 2.33 | 2.97 | 0.00 | 10.00 |
| 4th CTx cycle | Control | 50 | 2.08 | 2.31 | 1.42 | 2.74 | 0.00 | 8.00 | .678 | .851 |
| Exp 1 | 99 | 2.40 | 2.49 | 1.91 | 2.90 | 0.00 | 9.00 |
| Exp 2 | 100 | 2.41 | 2.39 | 1.94 | 2.88 | 0.00 | 10.00 |
| Total | 249 | 2.34 | 2.41 | 2.04 | 2.64 | 0.00 | 10.00 |
| Fatigue | baseline | Control | 50 | 2.26 | 2.07 | 1.67 | 2.85 | 0.00 | 8.00 | .866 | .641 |
| Exp 1 | 99 | 2.36 | 2.26 | 1.91 | 2.81 | 0.00 | 8.00 |
| Exp 2 | 100 | 2.39 | 2.69 | 1.86 | 2.92 | 0.00 | 10.00 |
| Total | 249 | 2.35 | 2.40 | 2.05 | 2.65 | 0.00 | 10.00 |
| 1st CTx cycle | Control | 50 | 3.66 | 2.50 | 2.95 | 4.37 | 0.00 | 10.00 | .302 | .172 |
| Exp 1 | 99 | 3.65 | 2.66 | 3.12 | 4.18 | 0.00 | 9.00 |
| Exp 2 | 100 | 4.18 | 2.82 | 3.62 | 4.74 | 0.00 | 10.00 |
| Total | 249 | 3.86 | 2.70 | 3.53 | 4.20 | 0.00 | 10.00 |
| 2nd CTx cycle | Control | 50 | 3.28 | 2.39 | 2.60 | 3.96 | 0.00 | 10.00 | .710 | .814 |
| Exp 1 | 99 | 3.63 | 2.62 | 3.10 | 4.15 | 0.00 | 9.00 |
| Exp 2 | 100 | 3.56 | 2.63 | 3.04 | 4.08 | 0.00 | 10.00 |
| Total | 249 | 3.53 | 2.57 | 3.21 | 3.85 | 0.00 | 10.00 |
| 3rd CTx cycle | Control | 50 | 3.52 | 2.52 | 2.80 | 4.24 | 0.00 | 9.00 | .624 | .435 |
| Exp 1 | 99 | 3.89 | 2.59 | 3.37 | 4.40 | 0.00 | 10.00 |
| Exp 2 | 100 | 3.58 | 2.57 | 3.07 | 4.09 | 0.00 | 10.00 |
| Total | 249 | 3.69 | 2.56 | 3.37 | 4.01 | 0.00 | 10.00 |
| 4th CTx cycle | Control | 50 | 3.44 | 2.80 | 2.64 | 4.24 | 0.00 | 10.00 | .759 | .454 |
| Exp 1 | 99 | 3.49 | 2.58 | 2.98 | 4.01 | 0.00 | 9.00 |
| Exp 2 | 100 | 3.23 | 2.43 | 2.75 | 3.71 | 0.00 | 10.00 |
| Total | 249 | 3.38 | 2.56 | 3.06 | 3.70 | 0.00 | 10.00 |
| Sleep disturbance | baseline | Control | 50 | 1.66 | 2.27 | 1.01 | 2.31 | 0.00 | 7.00 | .539 | .897 |
| Exp 1 | 99 | 2.17 | 2.65 | 1.64 | 2.70 | 0.00 | 8.00 |
| Exp 2 | 100 | 2.19 | 2.75 | 1.64 | 2.74 | 0.00 | 9.00 |
| Total | 249 | 2.08 | 2.62 | 1.75 | 2.40 | 0.00 | 9.00 |
| 1st CTx cycle | Control | 50 | 3.24 | 3.25 | 2.31 | 4.17 | 0.00 | 9.00 | .147 | .085 |
| Exp 1 | 99 | 2.27 | 2.75 | 1.72 | 2.82 | 0.00 | 10.00 |
| Exp 2 | 100 | 3.07 | 3.09 | 2.46 | 3.68 | 0.00 | 9.00 |
| Total | 249 | 2.79 | 3.01 | 2.41 | 3.16 | 0.00 | 10.00 |
| 2nd CTx cycle | Control | 50 | 2.22 | 2.88 | 1.40 | 3.04 | 0.00 | 10.00 | .084 | .094 |
| Exp 1 | 99 | 2.55 | 3.10 | 1.93 | 3.16 | 0.00 | 10.00 |
| Exp 2 | 100 | 3.23 | 2.97 | 2.64 | 3.82 | 0.00 | 9.00 |
| Total | 249 | 2.76 | 3.02 | 2.38 | 3.13 | 0.00 | 10.00 |
| 3rd CTx cycle | Control | 50 | 2.38 | 2.96 | 1.54 | 3.22 | 0.00 | 10.00 | .627 | .775 |
| Exp 1 | 99 | 2.85 | 2.97 | 2.26 | 3.44 | 0.00 | 10.00 |
| Exp 2 | 100 | 2.67 | 2.79 | 2.12 | 3.22 | 0.00 | 9.00 |
| Total | 249 | 2.68 | 2.89 | 2.32 | 3.04 | 0.00 | 10.00 |
| 4th CTx cycle | Control | 50 | 2.12 | 2.85 | 1.31 | 2.93 | 0.00 | 10.00 | .152 | .247 |
| Exp 1 | 99 | 3.04 | 3.03 | 2.44 | 3.64 | 0.00 | 10.00 |
| Exp 2 | 100 | 2.42 | 2.54 | 1.92 | 2.92 | 0.00 | 10.00 |
| Total | 249 | 2.61 | 2.82 | 2.25 | 2.96 | 0.00 | 10.00 |
| Anxiety | baseline | Control | 50 | 1.76 | 2.41 | 1.07 | 2.45 | 0.00 | 10.00 | .419 | .536 |
| Exp 1 | 99 | 2.11 | 2.61 | 1.59 | 2.63 | 0.00 | 10.00 |
| Exp 2 | 100 | 2.21 | 2.48 | 1.72 | 2.70 | 0.00 | 10.00 |
| Total | 249 | 2.08 | 2.51 | 1.77 | 2.39 | 0.00 | 10.00 |
| 1st CTx cycle | Control | 50 | 2.04 | 2.63 | 1.29 | 2.79 | 0.00 | 10.00 | .570 | .285 |
| Exp 1 | 99 | 1.89 | 2.50 | 1.39 | 2.39 | 0.00 | 8.00 |
| Exp 2 | 100 | 2.12 | 2.43 | 1.64 | 2.60 | 0.00 | 9.00 |
| Total | 249 | 2.01 | 2.49 | 1.70 | 2.32 | 0.00 | 10.00 |
| 2nd CTx cycle | Control | 50 | 1.88 | 2.42 | 1.19 | 2.57 | 0.00 | 8.00 | .930 | .797 |
| Exp 1 | 99 | 2.06 | 2.70 | 1.52 | 2.60 | 0.00 | 9.00 |
| Exp 2 | 100 | 2.00 | 2.40 | 1.52 | 2.48 | 0.00 | 10.00 |
| Total | 249 | 2.00 | 2.52 | 1.69 | 2.31 | 0.00 | 10.00 |
| 3rd CTx cycle | Control | 50 | 1.96 | 2.40 | 1.28 | 2.64 | 0.00 | 9.00 | .409 | .222 |
| Exp 1 | 99 | 2.09 | 2.50 | 1.59 | 2.59 | 0.00 | 10.00 |
| Exp 2 | 100 | 1.64 | 2.24 | 1.20 | 2.08 | 0.00 | 9.00 |
| Total | 249 | 1.88 | 2.38 | 1.59 | 2.18 | 0.00 | 10.00 |
| 4th CTx cycle | Control | 50 | 1.70 | 2.41 | 1.02 | 2.38 | 0.00 | 10.00 | .831 | .711 |
| Exp 1 | 99 | 1.84 | 2.44 | 1.35 | 2.33 | 0.00 | 9.00 |
| Exp 2 | 100 | 1.91 | 2.41 | 1.43 | 2.39 | 0.00 | 8.00 |
| Total | 249 | 1.84 | 2.42 | 1.54 | 2.14 | 0.00 | 10.00 |
| Depression | baseline | Control | 50 | 1.26 | 2.03 | 0.68 | 1.84 | 0.00 | 9.00 | .804 | .673 |
| Exp 1 | 99 | 1.21 | 2.19 | 0.78 | 1.65 | 0.00 | 9.00 |
| Exp 2 | 100 | 1.33 | 2.07 | 0.92 | 1.74 | 0.00 | 8.00 |
| Total | 249 | 1.27 | 2.11 | 1.01 | 1.53 | 0.00 | 9.00 |
| 1st CTx cycle | Control | 50 | 1.40 | 2.24 | 0.76 | 2.04 | 0.00 | 10.00 | .137 | .450 |
| Exp 1 | 99 | 2.01 | 2.53 | 1.51 | 2.51 | 0.00 | 8.00 |
| Exp 2 | 100 | 2.27 | 2.66 | 1.74 | 2.80 | 0.00 | 10.00 |
| Total | 249 | 1.99 | 2.54 | 1.68 | 2.31 | 0.00 | 10.00 |
| 2nd CTx cycle | Control | 50 | 1.68 | 2.35 | 1.01 | 2.35 | 0.00 | 9.00 | .590 | .393 |
| Exp 1 | 99 | 1.94 | 2.74 | 1.39 | 2.49 | 0.00 | 10.00 |
| Exp 2 | 100 | 1.93 | 2.22 | 1.49 | 2.37 | 0.00 | 8.00 |
| Total | 249 | 1.88 | 2.46 | 1.58 | 2.19 | 0.00 | 10.00 |
| 3rd CTx cycle | Control | 50 | 1.86 | 2.25 | 1.22 | 2.50 | 0.00 | 9.00 | .582 | .302 |
| Exp 1 | 99 | 2.19 | 2.61 | 1.67 | 2.71 | 0.00 | 10.00 |
| Exp 2 | 100 | 1.73 | 2.22 | 1.29 | 2.17 | 0.00 | 9.00 |
| Total | 249 | 1.94 | 2.39 | 1.64 | 2.24 | 0.00 | 10.00 |
| 4th CTx cycle | Control | 50 | 1.84 | 2.22 | 1.21 | 2.47 | 0.00 | 9.00 | .637 | .687 |
| Exp 1 | 99 | 1.73 | 2.50 | 1.23 | 2.23 | 0.00 | 10.00 |
| Exp 2 | 100 | 1.70 | 2.20 | 1.26 | 2.14 | 0.00 | 9.00 |
| Total | 249 | 1.74 | 2.32 | 1.45 | 2.03 | 0.00 | 10.00 |
| Pain | baseline | Control | 50 | 1.50 | 2.12 | 0.90 | 2.10 | 0.00 | 8.00 | .503 | .766 |
| Exp 1 | 99 | 1.85 | 2.23 | 1.40 | 2.29 | 0.00 | 9.00 |
| Exp 2 | 100 | 1.85 | 2.04 | 1.44 | 2.26 | 0.00 | 10.00 |
| Total | 249 | 1.78 | 2.13 | 1.51 | 2.04 | 0.00 | 10.00 |
| 1st CTx cycle | Control | 50 | 2.48 | 2.98 | 1.63 | 3.33 | 0.00 | 10.00 | .475 | .803 |
| Exp 1 | 99 | 3.04 | 2.94 | 2.45 | 3.63 | 0.00 | 10.00 |
| Exp 2 | 100 | 3.22 | 3.21 | 2.58 | 3.86 | 0.00 | 10.00 |
| Total | 249 | 3.00 | 3.06 | 2.62 | 3.38 | 0.00 | 10.00 |
| 2nd CTx cycle | Control | 50 | 2.86 | 3.16 | 1.96 | 3.76 | 0.00 | 9.00 | .909 | .679 |
| Exp 1 | 99 | 2.73 | 2.78 | 2.17 | 3.28 | 0.00 | 10.00 |
| Exp 2 | 100 | 2.50 | 2.50 | 2.00 | 3.00 | 0.00 | 8.00 |
| Total | 249 | 2.66 | 2.75 | 2.32 | 3.01 | 0.00 | 10.00 |
| 3rd CTx cycle | Control | 50 | 2.22 | 2.64 | 1.47 | 2.97 | 0.00 | 10.00 | .135 | .148 |
| Exp 1 | 99 | 3.08 | 2.86 | 2.51 | 3.65 | 0.00 | 10.00 |
| Exp 2 | 100 | 2.48 | 2.53 | 1.98 | 2.98 | 0.00 | 10.00 |
| Total | 249 | 2.67 | 2.70 | 2.33 | 3.00 | 0.00 | 10.00 |
| 4th CTx cycle | Control | 50 | 1.98 | 2.48 | 1.28 | 2.68 | 0.00 | 10.00 | .105 | .152 |
| Exp 1 | 99 | 2.84 | 2.58 | 2.32 | 3.35 | 0.00 | 9.00 |
| Exp 2 | 100 | 2.40 | 2.72 | 1.86 | 2.94 | 0.00 | 10.00 |
| Total | 249 | 2.49 | 2.63 | 2.16 | 2.82 | 0.00 | 10.00 |
| Dyspnea | baseline | Control | 50 | 0.60 | 1.68 | 0.12 | 1.08 | 0.00 | 10.00 | .226 | .177 |
| Exp 1 | 99 | 0.95 | 1.82 | 0.59 | 1.31 | 0.00 | 8.00 |
| Exp 2 | 100 | 0.67 | 1.47 | 0.38 | 0.96 | 0.00 | 8.00 |
| Total | 249 | 0.77 | 1.66 | 0.56 | 0.97 | 0.00 | 10.00 |
| 1st CTx cycle | Control | 50 | 1.56 | 2.43 | 0.87 | 2.25 | 0.00 | 8.00 | .682 | .813 |
| Exp 1 | 99 | 1.82 | 2.43 | 1.33 | 2.30 | 0.00 | 9.00 |
| Exp 2 | 100 | 1.71 | 2.36 | 1.24 | 2.18 | 0.00 | 9.00 |
| Total | 249 | 1.72 | 2.40 | 1.42 | 2.02 | 0.00 | 9.00 |
| 2nd CTx cycle | Control | 50 | 1.48 | 2.53 | 0.76 | 2.20 | 0.00 | 10.00 | .743 | .940 |
| Exp 1 | 99 | 1.62 | 2.36 | 1.14 | 2.09 | 0.00 | 9.00 |
| Exp 2 | 100 | 1.59 | 2.20 | 1.15 | 2.03 | 0.00 | 8.00 |
| Total | 249 | 1.58 | 2.33 | 1.29 | 1.87 | 0.00 | 10.00 |
| 3rd CTx cycle | Control | 50 | 1.60 | 2.44 | 0.91 | 2.29 | 0.00 | 10.00 | .753 | .494 |
| Exp 1 | 99 | 1.81 | 2.26 | 1.36 | 2.26 | 0.00 | 9.00 |
| Exp 2 | 100 | 1.54 | 2.06 | 1.13 | 1.95 | 0.00 | 9.00 |
| Total | 249 | 1.66 | 2.21 | 1.38 | 1.94 | 0.00 | 10.00 |
| 4th CTx cycle | Control | 50 | 1.62 | 2.33 | 0.96 | 2.28 | 0.00 | 9.00 | .438 | .198 |
| Exp 1 | 99 | 2.02 | 2.69 | 1.48 | 2.56 | 0.00 | 9.00 |
| Exp 2 | 100 | 1.47 | 2.12 | 1.05 | 1.89 | 0.00 | 8.00 |
| Total | 249 | 1.72 | 2.40 | 1.42 | 2.02 | 0.00 | 9.00 |
| Mucositis | baseline | Control | 50 | 0.22 | 0.76 | 0.00 | 0.44 | 0.00 | 3.00 | .874 | .850 |
| Exp 1 | 99 | 0.28 | 1.15 | 0.05 | 0.51 | 0.00 | 8.00 |
| Exp 2 | 100 | 0.31 | 1.26 | 0.06 | 0.56 | 0.00 | 10.00 |
| Total | 249 | 0.28 | 1.13 | 0.14 | 0.42 | 0.00 | 10.00 |
| 1st CTx cycle | Control | 50 | 1.68 | 2.22 | 1.05 | 2.31 | 0.00 | 7.00 | .342 | .277 |
| Exp 1 | 99 | 2.08 | 2.80 | 1.52 | 2.64 | 0.00 | 9.00 |
| Exp 2 | 100 | 2.71 | 3.29 | 2.06 | 3.36 | 0.00 | 10.00 |
| Total | 249 | 2.25 | 2.92 | 1.89 | 2.62 | 0.00 | 10.00 |
| 2nd CTx cycle | Control | 50 | 1.50 | 2.15 | 0.89 | 2.11 | 0.00 | 7.00 | .426 | .194 |
| Exp 1 | 99 | 1.59 | 2.52 | 1.08 | 2.09 | 0.00 | 10.00 |
| Exp 2 | 100 | 1.99 | 2.62 | 1.47 | 2.51 | 0.00 | 10.00 |
| Total | 249 | 1.73 | 2.49 | 1.42 | 2.04 | 0.00 | 10.00 |
| 3rd CTx cycle | Control | 50 | 1.20 | 1.81 | 0.69 | 1.71 | 0.00 | 7.00 | .419 | .554 |
| Exp 1 | 99 | 1.65 | 2.45 | 1.16 | 2.14 | 0.00 | 10.00 |
| Exp 2 | 100 | 1.82 | 2.55 | 1.31 | 2.33 | 0.00 | 10.00 |
| Total | 249 | 1.63 | 2.38 | 1.33 | 1.92 | 0.00 | 10.00 |
| 4th CTx cycle | Control | 50 | 1.48 | 2.27 | 0.83 | 2.13 | 0.00 | 8.00 | .871 | .635 |
| Exp 1 | 99 | 1.67 | 2.54 | 1.16 | 2.17 | 0.00 | 9.00 |
| Exp 2 | 100 | 1.58 | 2.20 | 1.14 | 2.02 | 0.00 | 8.00 |
| Total | 249 | 1.59 | 2.34 | 1.30 | 1.89 | 0.00 | 9.00 |
| Taste change | baseline | Control | 50 | 0.82 | 1.90 | 0.28 | 1.36 | 0.00 | 10.00 | .560 | .296 |
| Exp 1 | 99 | 0.85 | 1.80 | 0.49 | 1.21 | 0.00 | 7.00 |
| Exp 2 | 100 | 0.53 | 1.30 | 0.27 | 0.79 | 0.00 | 6.00 |
| Total | 249 | 0.71 | 1.64 | 0.51 | 0.92 | 0.00 | 10.00 |
| 1st CTx cycle | Control | 50 | 3.54 | 2.91 | 2.71 | 4.37 | 0.00 | 10.00 | .252 | .099 |
| Exp 1 | 99 | 3.22 | 2.95 | 2.63 | 3.81 | 0.00 | 10.00 |
| Exp 2 | 100 | 4.00 | 3.24 | 3.36 | 4.64 | 0.00 | 10.00 |
| Total | 249 | 3.60 | 3.07 | 3.22 | 3.98 | 0.00 | 10.00 |
| 2nd CTx cycle | Control | 50 | 3.28 | 3.02 | 2.42 | 4.14 | 0.00 | 10.00 | .796 | .825 |
| Exp 1 | 99 | 3.51 | 3.07 | 2.89 | 4.12 | 0.00 | 10.00 |
| Exp 2 | 100 | 3.54 | 2.85 | 2.97 | 4.11 | 0.00 | 10.00 |
| Total | 249 | 3.47 | 2.96 | 3.10 | 3.84 | 0.00 | 10.00 |
| 3rd CTx cycle | Control | 50 | 3.86 | 2.86 | 3.05 | 4.67 | 0.00 | 10.00 | .985 | .973 |
| Exp 1 | 99 | 3.78 | 3.06 | 3.17 | 4.39 | 0.00 | 10.00 |
| Exp 2 | 100 | 3.76 | 2.95 | 3.17 | 4.35 | 0.00 | 9.00 |
| Total | 249 | 3.79 | 2.96 | 3.42 | 4.16 | 0.00 | 10.00 |
| 4th CTx cycle | Control | 50 | 3.70 | 2.86 | 2.89 | 4.51 | 0.00 | 10.00 | .846 | .670 |
| Exp 1 | 99 | 3.66 | 3.12 | 3.03 | 4.28 | 0.00 | 10.00 |
| Exp 2 | 100 | 3.43 | 2.83 | 2.87 | 3.99 | 0.00 | 10.00 |
| Total | 249 | 3.57 | 2.94 | 3.21 | 3.94 | 0.00 | 10.00 |
| Loss of appetite | baseline | Control | 50 | 1.52 | 2.16 | 0.91 | 2.13 | 0.00 | 10.00 | .568 | .641 |
| Exp 1 | 99 | 1.31 | 1.90 | 0.93 | 1.69 | 0.00 | 6.00 |
| Exp 2 | 100 | 1.11 | 1.73 | 0.77 | 1.45 | 0.00 | 7.00 |
| Total | 249 | 1.27 | 1.89 | 1.04 | 1.51 | 0.00 | 10.00 |
| 1st CTx cycle | Control | 50 | 3.92 | 2.91 | 3.09 | 4.75 | 0.00 | 10.00 | .701 | .984 |
| Exp 1 | 99 | 4.31 | 3.02 | 3.71 | 4.91 | 0.00 | 10.00 |
| Exp 2 | 100 | 4.34 | 3.06 | 3.73 | 4.95 | 0.00 | 10.00 |
| Total | 249 | 4.24 | 3.01 | 3.87 | 4.62 | 0.00 | 10.00 |
| 2nd CTx cycle | Control | 50 | 3.56 | 2.94 | 2.73 | 4.39 | 0.00 | 10.00 | .981 | .950 |
| Exp 1 | 99 | 3.59 | 2.79 | 3.03 | 4.14 | 0.00 | 10.00 |
| Exp 2 | 100 | 3.53 | 2.66 | 3.00 | 4.06 | 0.00 | 9.00 |
| Total | 249 | 3.56 | 2.76 | 3.21 | 3.90 | 0.00 | 10.00 |
| 3rd CTx cycle | Control | 50 | 3.44 | 2.89 | 2.62 | 4.26 | 0.00 | 10.00 | .890 | .643 |
| Exp 1 | 99 | 3.52 | 2.84 | 2.95 | 4.08 | 0.00 | 10.00 |
| Exp 2 | 100 | 3.29 | 2.78 | 2.74 | 3.84 | 0.00 | 10.00 |
| Total | 249 | 3.41 | 2.82 | 3.06 | 3.76 | 0.00 | 10.00 |
| 4th CTx cycle | Control | 50 | 3.00 | 2.91 | 2.17 | 3.83 | 0.00 | 10.00 | .557 | .494 |
| Exp 1 | 99 | 3.53 | 3.08 | 2.91 | 4.14 | 0.00 | 10.00 |
| Exp 2 | 100 | 3.20 | 2.72 | 2.66 | 3.74 | 0.00 | 10.00 |
| Total | 249 | 3.29 | 2.90 | 2.93 | 3.65 | 0.00 | 10.00 |
| Nausea | baseline | Control | 50 | 0.26 | 0.72 | 0.05 | 0.47 | 0.00 | 4.00 | .878 | .618 |
| Exp 1 | 99 | 0.41 | 1.05 | 0.20 | 0.62 | 0.00 | 5.00 |
| Exp 2 | 100 | 0.32 | 0.95 | 0.13 | 0.51 | 0.00 | 5.00 |
| Total | 249 | 0.35 | 0.95 | 0.23 | 0.46 | 0.00 | 5.00 |
| 1st CTx cycle | Control | 50 | 3.72 | 3.16 | 2.82 | 4.62 | 0.00 | 10.00 | .710 | .501 |
| Exp 1 | 99 | 3.83 | 3.16 | 3.20 | 4.46 | 0.00 | 10.00 |
| Exp 2 | 100 | 4.14 | 3.28 | 3.49 | 4.79 | 0.00 | 10.00 |
| Total | 249 | 3.93 | 3.20 | 3.53 | 4.33 | 0.00 | 10.00 |
| 2nd CTx cycle | Control | 50 | 3.58 | 2.91 | 2.75 | 4.41 | 0.00 | 10.00 | .395 | .199 |
| Exp 1 | 99 | 3.20 | 2.95 | 2.61 | 3.79 | 0.00 | 10.00 |
| Exp 2 | 100 | 3.69 | 2.87 | 3.12 | 4.26 | 0.00 | 10.00 |
| Total | 249 | 3.47 | 2.91 | 3.11 | 3.84 | 0.00 | 10.00 |
| 3rd CTx cycle | Control | 50 | 3.22 | 2.88 | 2.40 | 4.04 | 0.00 | 10.00 | .948 | .766 |
| Exp 1 | 99 | 3.32 | 3.00 | 2.73 | 3.92 | 0.00 | 10.00 |
| Exp 2 | 100 | 3.15 | 2.75 | 2.60 | 3.70 | 0.00 | 10.00 |
| Total | 249 | 3.23 | 2.87 | 2.88 | 3.59 | 0.00 | 10.00 |
| 4th CTx cycle | Control | 50 | 2.52 | 2.69 | 1.76 | 3.28 | 0.00 | 10.00 | .718 | .909 |
| Exp 1 | 99 | 2.89 | 2.92 | 2.31 | 3.47 | 0.00 | 10.00 |
| Exp 2 | 100 | 2.84 | 2.72 | 2.30 | 3.38 | 0.00 | 10.00 |
| Total | 249 | 2.80 | 2.79 | 2.45 | 3.14 | 0.00 | 10.00 |
| Vomiting | baseline | Control | 50 | 0.08 | 0.57 | -0.08 | 0.24 | 0.00 | 4.00 | .687 | .722 |
| Exp 1 | 99 | 0.09 | 0.43 | 0.01 | 0.18 | 0.00 | 3.00 |
| Exp 2 | 100 | 0.07 | 0.36 | 0.00 | 0.14 | 0.00 | 2.00 |
| Total | 249 | 0.08 | 0.43 | 0.03 | 0.13 | 0.00 | 4.00 |
| 1st CTx cycle | Control | 50 | 1.06 | 2.32 | 0.40 | 1.72 | 0.00 | 8.00 | .524 | .458 |
| Exp 1 | 99 | 1.36 | 2.75 | 0.81 | 1.91 | 0.00 | 10.00 |
| Exp 2 | 100 | 1.09 | 2.46 | 0.60 | 1.58 | 0.00 | 10.00 |
| Total | 249 | 1.19 | 2.55 | 0.87 | 1.51 | 0.00 | 10.00 |
| 2nd CTx cycle | Control | 50 | 0.86 | 1.92 | 0.32 | 1.40 | 0.00 | 8.00 | .330 | .134 |
| Exp 1 | 99 | 1.03 | 2.15 | 0.60 | 1.46 | 0.00 | 10.00 |
| Exp 2 | 100 | 0.66 | 1.59 | 0.34 | 0.98 | 0.00 | 7.00 |
| Total | 249 | 0.85 | 1.90 | 0.61 | 1.08 | 0.00 | 10.00 |
| 3rd CTx cycle | Control | 50 | 0.74 | 1.75 | 0.24 | 1.24 | 0.00 | 8.00 | .309 | .137 |
| Exp 1 | 99 | 0.95 | 2.05 | 0.54 | 1.36 | 0.00 | 10.00 |
| Exp 2 | 100 | 0.50 | 1.53 | 0.20 | 0.80 | 0.00 | 10.00 |
| Total | 249 | 0.73 | 1.80 | 0.50 | 0.95 | 0.00 | 10.00 |
| 4th CTx cycle | Control | 50 | 0.34 | 1.15 | 0.01 | 0.67 | 0.00 | 7.00 | .189 | .919 |
| Exp 1 | 99 | 1.02 | 2.23 | 0.58 | 1.47 | 0.00 | 10.00 |
| Exp 2 | 100 | 0.99 | 2.38 | 0.52 | 1.46 | 0.00 | 10.00 |
| Total | 249 | 0.87 | 2.13 | 0.61 | 1.14 | 0.00 | 10.00 |
| Constipation | baseline | Control | 50 | 0.46 | 1.03 | 0.17 | 0.75 | 0.00 | 4.00 | .656 | .728 |
| Exp 1 | 99 | 0.91 | 1.88 | 0.53 | 1.29 | 0.00 | 8.00 |
| Exp 2 | 100 | 0.92 | 2.15 | 0.49 | 1.35 | 0.00 | 10.00 |
| Total | 249 | 0.82 | 1.87 | 0.59 | 1.06 | 0.00 | 10.00 |
| 1st CTx cycle | Control | 50 | 1.84 | 3.02 | 0.98 | 2.70 | 0.00 | 10.00 | .704 | .717 |
| Exp 1 | 99 | 2.04 | 2.87 | 1.47 | 2.61 | 0.00 | 10.00 |
| Exp 2 | 100 | 1.99 | 2.97 | 1.40 | 2.58 | 0.00 | 10.00 |
| Total | 249 | 1.98 | 2.93 | 1.61 | 2.35 | 0.00 | 10.00 |
| 2nd CTx cycle | Control | 50 | 1.56 | 2.74 | 0.78 | 2.34 | 0.00 | 10.00 | .787 | .900 |
| Exp 1 | 99 | 1.66 | 2.49 | 1.16 | 2.15 | 0.00 | 9.00 |
| Exp 2 | 100 | 1.67 | 2.59 | 1.16 | 2.18 | 0.00 | 9.00 |
| Total | 249 | 1.64 | 2.57 | 1.32 | 1.96 | 0.00 | 10.00 |
| 3rd CTx cycle | Control | 50 | 1.32 | 2.49 | 0.61 | 2.03 | 0.00 | 10.00 | .637 | .768 |
| Exp 1 | 99 | 1.69 | 2.59 | 1.17 | 2.20 | 0.00 | 10.00 |
| Exp 2 | 100 | 1.64 | 2.54 | 1.14 | 2.14 | 0.00 | 10.00 |
| Total | 249 | 1.59 | 2.54 | 1.28 | 1.91 | 0.00 | 10.00 |
| 4th CTx cycle | Control | 50 | 1.18 | 2.14 | 0.57 | 1.79 | 0.00 | 10.00 | .843 | .684 |
| Exp 1 | 99 | 1.48 | 2.47 | 0.99 | 1.98 | 0.00 | 10.00 |
| Exp 2 | 100 | 1.45 | 2.31 | 0.99 | 1.91 | 0.00 | 8.00 |
| Total | 249 | 1.41 | 2.34 | 1.12 | 1.70 | 0.00 | 10.00 |
| diarrhea | baseline | Control | 50 | 0.38 | 0.97 | 0.11 | 0.65 | 0.00 | 5.00 | .710 | .555 |
| Exp 1 | 99 | 0.32 | 0.82 | 0.16 | 0.49 | 0.00 | 3.00 |
| Exp 2 | 100 | 0.23 | 0.81 | 0.07 | 0.39 | 0.00 | 7.00 |
| Total | 249 | 0.30 | 0.85 | 0.19 | 0.40 | 0.00 | 7.00 |
| 1st CTx cycle | Control | 50 | 1.24 | 1.96 | 0.68 | 1.80 | 0.00 | 8.00 | .691 | .876 |
| Exp 1 | 99 | 1.37 | 2.48 | 0.88 | 1.87 | 0.00 | 10.00 |
| Exp 2 | 100 | 1.14 | 2.03 | 0.74 | 1.54 | 0.00 | 10.00 |
| Total | 249 | 1.25 | 2.20 | 0.98 | 1.53 | 0.00 | 10.00 |
| 2nd CTx cycle | Control | 50 | 1.26 | 2.00 | 0.69 | 1.83 | 0.00 | 8.00 | .593 | .399 |
| Exp 1 | 99 | 1.07 | 2.00 | 0.67 | 1.47 | 0.00 | 9.00 |
| Exp 2 | 100 | 1.32 | 2.14 | 0.90 | 1.74 | 0.00 | 9.00 |
| Total | 249 | 1.21 | 2.05 | 0.95 | 1.46 | 0.00 | 9.00 |
| 3rd CTx cycle | Control | 50 | 0.96 | 1.52 | 0.53 | 1.39 | 0.00 | 8.00 | .716 | .414 |
| Exp 1 | 99 | 1.54 | 2.63 | 1.01 | 2.06 | 0.00 | 10.00 |
| Exp 2 | 100 | 1.10 | 1.90 | 0.72 | 1.48 | 0.00 | 8.00 |
| Total | 249 | 1.24 | 2.17 | 0.97 | 1.52 | 0.00 | 10.00 |
| 4th CTx cycle | Control | 50 | 0.82 | 1.64 | 0.35 | 1.29 | 0.00 | 7.00 | .399 | .868 |
| Exp 1 | 99 | 1.23 | 2.11 | 0.81 | 1.65 | 0.00 | 9.00 |
| Exp 2 | 100 | 1.09 | 1.82 | 0.73 | 1.45 | 0.00 | 8.00 |
| Total | 249 | 1.09 | 1.90 | 0.85 | 1.33 | 0.00 | 9.00 |
| Urinary problem | baseline | Control | 50 | 0.24 | 0.77 | 0.02 | 0.46 | 0.00 | 3.00 | .524 | .547 |
| Exp 1 | 99 | 0.11 | 0.53 | 0.00 | 0.22 | 0.00 | 3.00 |
| Exp 2 | 100 | 0.22 | 0.94 | 0.03 | 0.41 | 0.00 | 7.00 |
| Total | 249 | 0.18 | 0.76 | 0.09 | 0.28 | 0.00 | 7.00 |
| 1st CTx cycle | Control | 50 | 0.46 | 1.64 | -0.01 | 0.93 | 0.00 | 10.00 | .116 | .059 |
| Exp 1 | 99 | 0.48 | 1.11 | 0.26 | 0.71 | 0.00 | 6.00 |
| Exp 2 | 100 | 0.41 | 1.33 | 0.15 | 0.67 | 0.00 | 7.00 |
| Total | 249 | 0.45 | 1.31 | 0.29 | 0.61 | 0.00 | 10.00 |
| 2nd CTx cycle | Control | 50 | 0.72 | 1.83 | 0.20 | 1.24 | 0.00 | 8.00 | .156 | .055 |
| Exp 1 | 99 | 0.76 | 1.55 | 0.45 | 1.07 | 0.00 | 8.00 |
| Exp 2 | 100 | 0.58 | 1.64 | 0.25 | 0.91 | 0.00 | 8.00 |
| Total | 249 | 0.68 | 1.64 | 0.47 | 0.88 | 0.00 | 8.00 |
| 3rd CTx cycle | Control | 50 | 0.94 | 1.86 | 0.41 | 1.47 | 0.00 | 8.00 | .144 | .147 |
| Exp 1 | 99 | 0.86 | 1.80 | 0.50 | 1.22 | 0.00 | 8.00 |
| Exp 2 | 100 | 0.54 | 1.42 | 0.26 | 0.82 | 0.00 | 6.00 |
| Total | 249 | 0.75 | 1.67 | 0.54 | 0.96 | 0.00 | 8.00 |
| 4th CTx cycle | Control | 50 | 0.82 | 2.15 | 0.21 | 1.43 | 0.00 | 10.00 | .884 | .801 |
| Exp 1 | 99 | 0.71 | 1.71 | 0.37 | 1.05 | 0.00 | 8.00 |
| Exp 2 | 100 | 0.81 | 1.79 | 0.45 | 1.17 | 0.00 | 8.00 |
| Total | 249 | 0.77 | 1.83 | 0.54 | 1.00 | 0.00 | 10.00 |
| Sexual problem | baseline | Control | 50 | 0.06 | 0.42 | -0.06 | 0.18 | 0.00 | 3.00 | .925 | .997 |
| Exp 1 | 99 | 0.13 | 0.86 | -0.04 | 0.30 | 0.00 | 7.00 |
| Exp 2 | 100 | 0.17 | 1.07 | -0.04 | 0.38 | 0.00 | 8.00 |
| Total | 249 | 0.13 | 0.89 | 0.02 | 0.24 | 0.00 | 8.00 |
| 1st CTx cycle | Control | 50 | 0.22 | 1.06 | -0.08 | 0.52 | 0.00 | 7.00 | .482 | .277 |
| Exp 1 | 99 | 0.16 | 0.77 | 0.01 | 0.31 | 0.00 | 5.00 |
| Exp 2 | 100 | 0.50 | 1.80 | 0.14 | 0.86 | 0.00 | 10.00 |
| Total | 249 | 0.31 | 1.33 | 0.14 | 0.47 | 0.00 | 10.00 |
| 2nd CTx cycle | Control | 50 | 0.40 | 1.55 | -0.04 | 0.84 | 0.00 | 9.00 | .314 | .143 |
| Exp 1 | 99 | 0.55 | 1.69 | 0.21 | 0.88 | 0.00 | 10.00 |
| Exp 2 | 100 | 0.49 | 1.91 | 0.11 | 0.87 | 0.00 | 10.00 |
| Total | 249 | 0.49 | 1.75 | 0.28 | 0.71 | 0.00 | 10.00 |
| 3rd CTx cycle | Control | 50 | 0.40 | 1.53 | -0.03 | 0.83 | 0.00 | 10.00 | .871 | .660 |
| Exp 1 | 99 | 0.63 | 1.85 | 0.26 | 1.00 | 0.00 | 10.00 |
| Exp 2 | 100 | 0.56 | 1.93 | 0.18 | 0.94 | 0.00 | 10.00 |
| Total | 249 | 0.55 | 1.82 | 0.33 | 0.78 | 0.00 | 10.00 |
| 4th CTx cycle | Control | 50 | 0.18 | 0.63 | 0.00 | 0.36 | 0.00 | 3.00 | .414 | .621 |
| Exp 1 | 99 | 0.75 | 2.08 | 0.33 | 1.16 | 0.00 | 10.00 |
| Exp 2 | 100 | 0.55 | 1.80 | 0.19 | 0.91 | 0.00 | 8.00 |
| Total | 249 | 0.55 | 1.77 | 0.33 | 0.77 | 0.00 | 10.00 |
| Skin and nail changes | baseline | Control | 50 | 0.22 | 1.20 | -0.12 | 0.56 | 0.00 | 8.00 | .157 | .108 |
| Exp 1 | 99 | 0.39 | 1.38 | 0.12 | 0.67 | 0.00 | 8.00 |
| Exp 2 | 100 | 0.12 | 0.59 | 0.00 | 0.24 | 0.00 | 4.00 |
| Total | 249 | 0.25 | 1.09 | 0.11 | 0.39 | 0.00 | 8.00 |
| 1st CTx cycle | Control | 50 | 1.02 | 2.26 | 0.38 | 1.66 | 0.00 | 10.00 | .404 | .409 |
| Exp 1 | 99 | 1.21 | 1.93 | 0.83 | 1.60 | 0.00 | 10.00 |
| Exp 2 | 100 | 0.95 | 1.68 | 0.62 | 1.28 | 0.00 | 9.00 |
| Total | 249 | 1.07 | 1.90 | 0.83 | 1.31 | 0.00 | 10.00 |
| 2nd CTx cycle | Control | 50 | 1.98 | 2.21 | 1.35 | 2.61 | 0.00 | 9.00 | .729 | .535 |
| Exp 1 | 99 | 2.39 | 2.65 | 1.87 | 2.92 | 0.00 | 9.00 |
| Exp 2 | 100 | 2.08 | 2.38 | 1.61 | 2.55 | 0.00 | 9.00 |
| Total | 249 | 2.18 | 2.46 | 1.88 | 2.49 | 0.00 | 9.00 |
| 3rd CTx cycle | Control | 50 | 2.56 | 2.38 | 1.88 | 3.24 | 0.00 | 10.00 | .904 | .808 |
| Exp 1 | 99 | 2.69 | 2.72 | 2.14 | 3.23 | 0.00 | 10.00 |
| Exp 2 | 100 | 2.68 | 2.36 | 2.21 | 3.15 | 0.00 | 10.00 |
| Total | 249 | 2.66 | 2.51 | 2.35 | 2.97 | 0.00 | 10.00 |
| 4th CTx cycle | Control | 50 | 2.46 | 2.39 | 1.78 | 3.14 | 0.00 | 9.00 | .634 | .415 |
| Exp 1 | 99 | 2.62 | 2.77 | 2.06 | 3.17 | 0.00 | 10.00 |
| Exp 2 | 100 | 2.75 | 2.28 | 2.30 | 3.20 | 0.00 | 9.00 |
| Total | 249 | 2.64 | 2.50 | 2.33 | 2.95 | 0.00 | 10.00 |
| Alopecia | baseline | Control | 50 | 0.26 | 0.99 | -0.02 | 0.54 | 0.00 | 6.00 | .351 | .255 |
| Exp 1 | 99 | 0.54 | 1.45 | 0.25 | 0.82 | 0.00 | 7.00 |
| Exp 2 | 100 | 0.29 | 1.06 | 0.08 | 0.50 | 0.00 | 8.00 |
| Total | 249 | 0.38 | 1.22 | 0.23 | 0.53 | 0.00 | 8.00 |
| 1st CTx cycle | Control | 50 | 4.84 | 4.41 | 3.59 | 6.09 | 0.00 | 10.00 | .738 | .577 |
| Exp 1 | 99 | 5.06 | 4.22 | 4.22 | 5.90 | 0.00 | 10.00 |
| Exp 2 | 100 | 5.38 | 4.43 | 4.50 | 6.26 | 0.00 | 10.00 |
| Total | 249 | 5.14 | 4.33 | 4.60 | 5.69 | 0.00 | 10.00 |
| 2nd CTx cycle | Control | 50 | 4.66 | 4.19 | 3.47 | 5.85 | 0.00 | 10.00 | .996 | .963 |
| Exp 1 | 99 | 4.87 | 4.18 | 4.03 | 5.70 | 0.00 | 10.00 |
| Exp 2 | 100 | 4.81 | 4.13 | 3.99 | 5.63 | 0.00 | 10.00 |
| Total | 249 | 4.80 | 4.15 | 4.29 | 5.32 | 0.00 | 10.00 |
| 3rd CTx cycle | Control | 50 | 5.00 | 4.24 | 3.80 | 6.20 | 0.00 | 10.00 | .147 | .464 |
| Exp 1 | 99 | 3.80 | 4.12 | 2.98 | 4.62 | 0.00 | 10.00 |
| Exp 2 | 100 | 4.05 | 3.97 | 3.26 | 4.84 | 0.00 | 10.00 |
| Total | 249 | 4.14 | 4.09 | 3.63 | 4.65 | 0.00 | 10.00 |
| 4th CTx cycle | Control | 50 | 3.94 | 4.15 | 2.76 | 5.12 | 0.00 | 10.00 | .599 | .903 |
| Exp 1 | 99 | 3.41 | 4.10 | 2.60 | 4.23 | 0.00 | 10.00 |
| Exp 2 | 100 | 3.33 | 3.83 | 2.57 | 4.09 | 0.00 | 10.00 |
| Total | 249 | 3.49 | 4.00 | 2.99 | 3.98 | 0.00 | 10.00 |
| Peripheral neuropathy | baseline | Control | 50 | 0.66 | 1.27 | 0.30 | 1.02 | 0.00 | 5.00 | .470 | .229 |
| Exp 1 | 99 | 0.92 | 1.70 | 0.58 | 1.26 | 0.00 | 8.00 |
| Exp 2 | 100 | 0.67 | 1.41 | 0.39 | 0.95 | 0.00 | 7.00 |
| Total | 249 | 0.77 | 1.51 | 0.58 | 0.96 | 0.00 | 8.00 |
| 1st CTx cycle | Control | 50 | 1.94 | 2.64 | 1.19 | 2.69 | 0.00 | 9.00 | .997 | .961 |
| Exp 1 | 99 | 1.87 | 2.38 | 1.39 | 2.34 | 0.00 | 9.00 |
| Exp 2 | 100 | 1.90 | 2.43 | 1.42 | 2.38 | 0.00 | 10.00 |
| Total | 249 | 1.90 | 2.45 | 1.59 | 2.20 | 0.00 | 10.00 |
| 2nd CTx cycle | Control | 50 | 2.20 | 2.26 | 1.56 | 2.84 | 0.00 | 8.00 | .925 | .712 |
| Exp 1 | 99 | 2.37 | 2.57 | 1.86 | 2.89 | 0.00 | 9.00 |
| Exp 2 | 100 | 2.28 | 2.63 | 1.76 | 2.80 | 0.00 | 9.00 |
| Total | 249 | 2.30 | 2.53 | 1.99 | 2.62 | 0.00 | 9.00 |
| 3rd CTx cycle | Control | 50 | 1.74 | 2.17 | 1.12 | 2.36 | 0.00 | 8.00 | .275 | .911 |
| Exp 1 | 99 | 2.41 | 2.57 | 1.90 | 2.93 | 0.00 | 10.00 |
| Exp 2 | 100 | 2.55 | 2.77 | 2.00 | 3.10 | 0.00 | 10.00 |
| Total | 249 | 2.33 | 2.59 | 2.01 | 2.66 | 0.00 | 10.00 |
| 4th CTx cycle | Control | 50 | 1.84 | 2.29 | 1.19 | 2.49 | 0.00 | 10.00 | .173 | .191 |
| Exp 1 | 99 | 2.74 | 2.86 | 2.17 | 3.31 | 0.00 | 10.00 |
| Exp 2 | 100 | 2.12 | 2.40 | 1.64 | 2.60 | 0.00 | 8.00 |
| Total | 249 | 2.31 | 2.59 | 1.99 | 2.63 | 0.00 | 10.00 |
