# Supplementary material for: Development and evaluation of the Cancer Symptom Management System: Symptom Management Improves your LifE (SMILE)—a randomized controlled trial
Source: Springer Nature journal article supplement (doi:10.1007/s00520-019-04865-3), 2019-05-25
Supplement: MOESM2 [file 16750634]

**Supplementary 2. MDASI and EORTC QLQ-C30 scores**

|  | | | n | Mean | SD | 95% CI | | Min | Max | Kruskall-Wallis Difference (baseline – before 5th CTx cycle) among  3 groups  (N=249) | Mann Whitney U Difference (baseline – before 5th CTx cycle) between  Exp 1 vs. Exp 2  (n=199) |
| --- | --- | --- | --- | --- | --- | --- | --- | --- | --- | --- | --- |
| *p*-value | |
| **MDASI** |  |  |  |  |  |  |  |  |  |  |  |
| Symptom severity | Baseline | Control | 50 | 0.91 | 1.07 | 0.61 | 1.22 | 0.00 | 5.77 | .146 | .689 |
| Exp 1 | 99 | 1.08 | 0.90 | 0.90 | 1.26 | 0.00 | 4.00 |
| Exp 2 | 100 | 0.94 | 0.87 | 0.77 | 1.11 | 0.00 | 3.54 |
| Total | 249 | 0.99 | 0.93 | 0.88 | 1.11 | 0.00 | 5.77 |
| Before 5th CTx cycle | Control | 50 | 1.01 | 1.05 | 0.71 | 1.31 | 0.00 | 4.46 |
| Exp 1 | 99 | 1.70 | 1.54 | 1.39 | 2.01 | 0.00 | 7.00 |
| Exp 2 | 100 | 1.38 | 1.23 | 1.14 | 1.62 | 0.00 | 5.77 |
| Total | 249 | 1.43 | 1.35 | 1.26 | 1.60 | 0.00 | 7.00 |
| Difference (baseline – before 5th CTx cycle) | Control | 50 | -0.10 | 0.99 | -0.38 | 0.19 | -3.23 | 2.69 |
| Exp 1 | 99 | -0.62 | 1.55 | -0.93 | -0.31 | -5.69 | 2.38 |
| Exp 2 | 100 | -0.44 | 1.27 | -0.69 | -0.19 | -5.08 | 2.69 |
| Total | 249 | -0.44 | 1.35 | -0.61 | -0.27 | -5.69 | 2.69 |
| Symptom interference | Baseline | Control | 50 | 0.68 | 1.19 | 0.34 | 1.02 | 0.00 | 4.50 | .256 | .105 |
| Exp 1 | 99 | 1.06 | 1.36 | 0.79 | 1.33 | 0.00 | 5.33 |
| Exp 2 | 100 | 0.64 | 0.95 | 0.45 | 0.83 | 0.00 | 5.67 |
| Total | 249 | 0.81 | 1.19 | 0.66 | 0.96 | 0.00 | 5.67 |
| Before 5th CTx cycle | Control | 50 | 0.83 | 1.60 | 0.38 | 1.28 | 0.00 | 8.17 |
| Exp 1 | 99 | 1.22 | 1.87 | 0.84 | 1.59 | 0.00 | 7.67 |
| Exp 2 | 100 | 1.12 | 1.57 | 0.80 | 1.43 | 0.00 | 8.00 |
| Total | 249 | 1.10 | 1.70 | 0.89 | 1.31 | 0.00 | 8.17 |
| Difference (baseline – before 5th CTx cycle) | Control | 50 | -0.15 | 1.60 | -0.61 | 0.30 | -6.00 | 3.33 |
| Exp 1 | 99 | -0.16 | 2.04 | -0.57 | 0.25 | -7.67 | 4.00 |
| Exp 2 | 100 | -0.48 | 1.58 | -0.79 | -0.16 | -6.50 | 3.00 |
| Total | 249 | -0.29 | 1.78 | -0.51 | -0.06 | -7.67 | 4.00 |
| **EORTC QLQ-C30** | |  |  |  |  |  |  |  |  |  |  |
| Emotional Symptom (Emotional Function) | Baseline | Control | 50 | 86.17 | 13.74 | 82.26 | 90.07 | 50.00 | 100.00 | .735 | .580 |
| Exp 1 | 99 | 83.00 | 18.82 | 79.24 | 86.75 | 33.33 | 100.00 |
| Exp 2 | 100 | 82.00 | 16.53 | 78.72 | 85.28 | 33.33 | 100.00 |
| Total | 249 | 83.23 | 16.99 | 81.11 | 85.35 | 33.33 | 100.00 |
| Before 5th CTx cycle | Control | 50 | 87.83 | 16.43 | 83.16 | 92.50 | 8.33 | 100.00 |
| Exp 1 | 99 | 85.86 | 15.99 | 82.67 | 89.05 | 16.67 | 100.00 |
| Exp 2 | 100 | 85.42 | 17.02 | 82.04 | 88.79 | 33.33 | 100.00 |
| Total | 249 | 86.08 | 16.46 | 84.02 | 88.13 | 8.33 | 100.00 |
| Difference (baseline – before 5th CTx cycle) | Control | 50 | -1.67 | 14.96 | -5.92 | 2.59 | -33.33 | 41.67 |
| Exp 1 | 99 | -2.86 | 17.90 | -6.43 | 0.71 | -50.00 | 50.00 |
| Exp 2 | 100 | -3.42 | 17.57 | -6.90 | 0.07 | -50.00 | 58.33 |
| Total | 249 | -2.84 | 17.16 | -4.99 | -0.70 | -50.00 | 58.33 |
| Cognitive Symptom (Cognitive Function) | Baseline | Control | 50 | 94.00 | 9.38 | 91.33 | 96.67 | 66.67 | 100.00 | .656 | .903 |
| Exp 1 | 99 | 91.08 | 12.89 | 88.51 | 93.65 | 50.00 | 100.00 |
| Exp 2 | 100 | 92.00 | 11.48 | 89.72 | 94.28 | 50.00 | 100.00 |
| Total | 249 | 92.03 | 11.70 | 90.57 | 93.49 | 50.00 | 100.00 |
| Before 5th CTx cycle | Control | 50 | 89.33 | 16.75 | 84.57 | 94.10 | 16.67 | 100.00 |
| Exp 1 | 99 | 85.35 | 17.05 | 81.95 | 88.75 | 33.33 | 100.00 |
| Exp 2 | 100 | 84.67 | 18.30 | 81.04 | 88.30 | 16.67 | 100.00 |
| Total | 249 | 85.88 | 17.52 | 83.69 | 88.06 | 16.67 | 100.00 |
| Difference (baseline – before 5th CTx cycle) | Control | 50 | 4.67 | 15.45 | 0.28 | 9.06 | -16.67 | 50.00 |
| Exp 1 | 99 | 5.72 | 16.52 | 2.43 | 9.02 | -33.33 | 50.00 |
| Exp 2 | 100 | 7.33 | 17.62 | 3.84 | 10.83 | -16.67 | 66.67 |
| Total | 249 | 6.16 | 16.73 | 4.07 | 8.25 | -33.33 | 66.67 |
| Fatigue | Baseline | Control | 50 | 17.11 | 13.51 | 13.27 | 20.95 | 0.00 | 55.56 | .443 | .690 |
| Exp 1 | 99 | 20.09 | 16.01 | 16.90 | 23.28 | 0.00 | 88.89 |
| Exp 2 | 100 | 19.89 | 16.59 | 16.60 | 23.18 | 0.00 | 88.89 |
| Total | 249 | 19.41 | 15.76 | 17.44 | 21.38 | 0.00 | 88.89 |
| Before 5th CTx cycle | Control | 50 | 19.11 | 19.57 | 13.55 | 24.67 | 0.00 | 100.00 |
| Exp 1 | 99 | 26.04 | 19.12 | 22.22 | 29.85 | 0.00 | 100.00 |
| Exp 2 | 100 | 25.00 | 21.09 | 20.81 | 29.19 | 0.00 | 100.00 |
| Total | 249 | 24.23 | 20.12 | 21.72 | 26.74 | 0.00 | 100.00 |
| Difference (baseline – before 5th CTx cycle) | Control | 50 | -2.00 | 20.04 | -7.70 | 3.70 | -66.67 | 44.44 |
| Exp 1 | 99 | -5.95 | 22.91 | -10.52 | -1.38 | -77.78 | 55.56 |
| Exp 2 | 100 | -5.11 | 20.80 | -9.24 | -0.98 | -77.78 | 44.44 |
| Total | 249 | -4.82 | 21.48 | -7.50 | -2.14 | -77.78 | 55.56 |
| Nausea and Vomiting | Baseline | Control | 50 | 2.33 | 6.74 | 0.42 | 4.25 | 0.00 | 33.33 | .760 | .709 |
| Exp 1 | 99 | 3.20 | 9.43 | 1.32 | 5.08 | 0.00 | 50.00 |
| Exp 2 | 100 | 2.17 | 6.55 | 0.87 | 3.47 | 0.00 | 33.33 |
| Total | 249 | 2.61 | 7.84 | 1.63 | 3.59 | 0.00 | 50.00 |
| Before 5th CTx cycle | Control | 50 | 6.00 | 12.03 | 2.58 | 9.42 | 0.00 | 50.00 |
| Exp 1 | 99 | 9.26 | 18.01 | 5.67 | 12.85 | 0.00 | 100.00 |
| Exp 2 | 100 | 6.33 | 12.03 | 3.95 | 8.72 | 0.00 | 66.67 |
| Total | 249 | 7.43 | 14.72 | 5.59 | 9.27 | 0.00 | 100.00 |
| Difference (baseline – before 5th CTx cycle) | Control | 50 | -3.67 | 14.40 | -7.76 | 0.43 | -50.00 | 33.33 |
| Exp 1 | 99 | -6.06 | 19.41 | -9.93 | -2.19 | -100.00 | 33.33 |
| Exp 2 | 100 | -4.17 | 13.06 | -6.76 | -1.58 | -66.67 | 33.33 |
| Total | 249 | -4.82 | 16.09 | -6.83 | -2.81 | -100.00 | 33.33 |
| Pain | Baseline | Control | 50 | 12.00 | 17.83 | 6.93 | 17.07 | 0.00 | 83.33 | .531 | .312 |
| Exp 1 | 99 | 12.79 | 15.94 | 9.62 | 15.97 | 0.00 | 66.67 |
| Exp 2 | 100 | 12.67 | 15.56 | 9.58 | 15.75 | 0.00 | 100.00 |
| Total | 249 | 12.58 | 16.12 | 10.57 | 14.60 | 0.00 | 100.00 |
| Before 5th CTx cycle | Control | 50 | 13.67 | 22.51 | 7.27 | 20.06 | 0.00 | 83.33 |
| Exp 1 | 99 | 14.65 | 17.70 | 11.12 | 18.18 | 0.00 | 66.67 |
| Exp 2 | 100 | 13.00 | 19.90 | 9.05 | 16.95 | 0.00 | 100.00 |
| Total | 249 | 13.79 | 19.56 | 11.35 | 16.23 | 0.00 | 100.00 |
| Difference (baseline – before 5th CTx cycle) | Control | 50 | -1.67 | 18.82 | -7.02 | 3.68 | -50.00 | 66.67 |
| Exp 1 | 99 | -1.85 | 19.90 | -5.82 | 2.12 | -50.00 | 66.67 |
| Exp 2 | 100 | -0.33 | 22.72 | -4.84 | 4.17 | -100.00 | 66.67 |
| Total | 249 | -1.20 | 20.81 | -3.80 | 1.39 | -100.00 | 66.67 |
| Dyspnea | Baseline | Control | 50 | 6.67 | 17.82 | 1.60 | 11.73 | 0.00 | 100.00 | .724 | .722 |
| Exp 1 | 99 | 10.77 | 17.06 | 7.37 | 14.18 | 0.00 | 66.67 |
| Exp 2 | 100 | 7.67 | 14.87 | 4.72 | 10.62 | 0.00 | 66.67 |
| Total | 249 | 8.70 | 16.40 | 6.65 | 10.75 | 0.00 | 100.00 |
| Before 5th CTx cycle | Control | 50 | 14.67 | 19.24 | 9.20 | 20.13 | 0.00 | 66.67 |
| Exp 1 | 99 | 17.85 | 25.34 | 12.79 | 22.90 | 0.00 | 100.00 |
| Exp 2 | 100 | 13.00 | 19.47 | 9.14 | 16.86 | 0.00 | 66.67 |
| Total | 249 | 15.26 | 21.98 | 12.52 | 18.00 | 0.00 | 100.00 |
| Difference (baseline – before 5th CTx cycle) | Control | 50 | -8.00 | 20.82 | -13.92 | -2.08 | -66.67 | 33.33 |
| Exp 1 | 99 | -7.07 | 25.32 | -12.12 | -2.02 | -66.67 | 33.33 |
| Exp 2 | 100 | -5.33 | 21.04 | -9.51 | -1.16 | -66.67 | 33.33 |
| Total | 249 | -6.56 | 22.73 | -9.40 | -3.72 | -66.67 | 33.33 |
| Insomnia | Baseline | Control | 50 | 12.67 | 18.92 | 7.29 | 18.04 | 0.00 | 66.67 | .656 | .507 |
| Exp 1 | 99 | 19.87 | 24.71 | 14.94 | 24.79 | 0.00 | 100.00 |
| Exp 2 | 100 | 19.67 | 25.56 | 14.60 | 24.74 | 0.00 | 100.00 |
| Total | 249 | 18.34 | 24.10 | 15.33 | 21.35 | 0.00 | 100.00 |
| Before 5th CTx cycle | Control | 50 | 14.00 | 24.36 | 7.08 | 20.92 | 0.00 | 100.00 |
| Exp 1 | 99 | 24.24 | 26.86 | 18.89 | 29.60 | 0.00 | 100.00 |
| Exp 2 | 100 | 20.00 | 24.16 | 15.21 | 24.79 | 0.00 | 100.00 |
| Total | 249 | 20.48 | 25.49 | 17.30 | 23.66 | 0.00 | 100.00 |
| Difference (baseline – before 5th CTx cycle) | Control | 50 | -1.33 | 24.24 | -8.22 | 5.56 | -66.67 | 33.33 |
| Exp 1 | 99 | -4.38 | 31.82 | -10.72 | 1.97 | -100.00 | 66.67 |
| Exp 2 | 100 | -0.33 | 31.25 | -6.53 | 5.87 | -66.67 | 100.00 |
| Total | 249 | -2.14 | 30.16 | -5.91 | 1.62 | -100.00 | 100.00 |
| Appetite | Baseline | Control | 50 | 16.67 | 25.42 | 9.44 | 23.89 | 0.00 | 100.00 | .100 | .749 |
| Exp 1 | 99 | 10.77 | 17.71 | 7.24 | 14.31 | 0.00 | 66.67 |
| Exp 2 | 100 | 11.33 | 16.56 | 8.05 | 14.62 | 0.00 | 66.67 |
| Total | 249 | 12.18 | 19.14 | 9.79 | 14.57 | 0.00 | 100.00 |
| Before 5th CTx cycle | Control | 50 | 14.67 | 23.48 | 7.99 | 21.34 | 0.00 | 100.00 |
| Exp 1 | 99 | 22.22 | 29.35 | 16.37 | 28.08 | 0.00 | 100.00 |
| Exp 2 | 100 | 19.67 | 25.11 | 14.68 | 24.65 | 0.00 | 100.00 |
| Total | 249 | 19.68 | 26.62 | 16.36 | 23.00 | 0.00 | 100.00 |
| Difference (baseline – before 5th CTx cycle) | Control | 50 | 2.00 | 35.26 | -8.02 | 12.02 | -100.00 | 100.00 |
| Exp 1 | 99 | -11.45 | 33.39 | -18.11 | -4.79 | -100.00 | 33.33 |
| Exp 2 | 100 | -8.33 | 27.37 | -13.76 | -2.90 | -100.00 | 33.33 |
| Total | 249 | -7.50 | 31.78 | -11.46 | -3.53 | -100.00 | 100.00 |
| Constipation | Baseline | Control | 50 | 4.67 | 11.68 | 1.35 | 7.99 | 0.00 | 33.33 | .849 | .761 |
| Exp 1 | 99 | 7.41 | 16.19 | 4.18 | 10.64 | 0.00 | 66.67 |
| Exp 2 | 100 | 8.33 | 20.31 | 4.30 | 12.36 | 0.00 | 100.00 |
| Total | 249 | 7.23 | 17.23 | 5.08 | 9.38 | 0.00 | 100.00 |
| Before 5th CTx cycle | Control | 50 | 6.67 | 13.47 | 2.84 | 10.49 | 0.00 | 33.33 |
| Exp 1 | 99 | 8.08 | 17.88 | 4.52 | 11.65 | 0.00 | 66.67 |
| Exp 2 | 100 | 9.00 | 18.26 | 5.38 | 12.62 | 0.00 | 66.67 |
| Total | 249 | 8.17 | 17.20 | 6.02 | 10.31 | 0.00 | 66.67 |
| Difference (baseline – before 5th CTx cycle) | Control | 50 | -2.00 | 18.33 | -7.21 | 3.21 | -33.33 | 33.33 |
| Exp 1 | 99 | -0.67 | 23.32 | -5.32 | 3.98 | -66.67 | 66.67 |
| Exp 2 | 100 | -0.67 | 24.15 | -5.46 | 4.12 | -66.67 | 100.00 |
| Total | 249 | -0.94 | 22.68 | -3.77 | 1.89 | -66.67 | 100.00 |
| Diarrhea | Baseline | Control | 50 | 4.67 | 11.68 | 1.35 | 7.99 | 0.00 | 33.33 | .824 | .752 |
| Exp 1 | 99 | 4.71 | 11.67 | 2.39 | 7.04 | 0.00 | 33.33 |
| Exp 2 | 100 | 3.00 | 10.69 | 0.88 | 5.12 | 0.00 | 66.67 |
| Total | 249 | 4.02 | 11.28 | 2.61 | 5.42 | 0.00 | 66.67 |
| Before 5th CTx cycle | Control | 50 | 8.00 | 17.25 | 3.10 | 12.90 | 0.00 | 66.67 |
| Exp 1 | 99 | 8.75 | 16.21 | 5.52 | 11.99 | 0.00 | 66.67 |
| Exp 2 | 100 | 8.00 | 16.49 | 4.73 | 11.27 | 0.00 | 66.67 |
| Total | 249 | 8.30 | 16.47 | 6.24 | 10.36 | 0.00 | 66.67 |
| Difference (baseline – before 5th CTx cycle) | Control | 50 | -3.33 | 16.84 | -8.12 | 1.45 | -66.67 | 33.33 |
| Exp 1 | 99 | -4.04 | 16.68 | -7.37 | -0.71 | -66.67 | 33.33 |
| Exp 2 | 100 | -5.00 | 16.67 | -8.31 | -1.69 | -66.67 | 33.33 |
| Total | 249 | -4.28 | 16.65 | -6.36 | -2.21 | -66.67 | 33.33 |
